# Supplementary material for: Genome-wide identification and expression profiles of ERF subfamily transcription factors inZea mays
Source: PeerJ journal article supplement (doi:10.7717/peerj.9551), 2020-07-17
Supplement: Figure_S2.pdf [file Figure_S2.pdf]

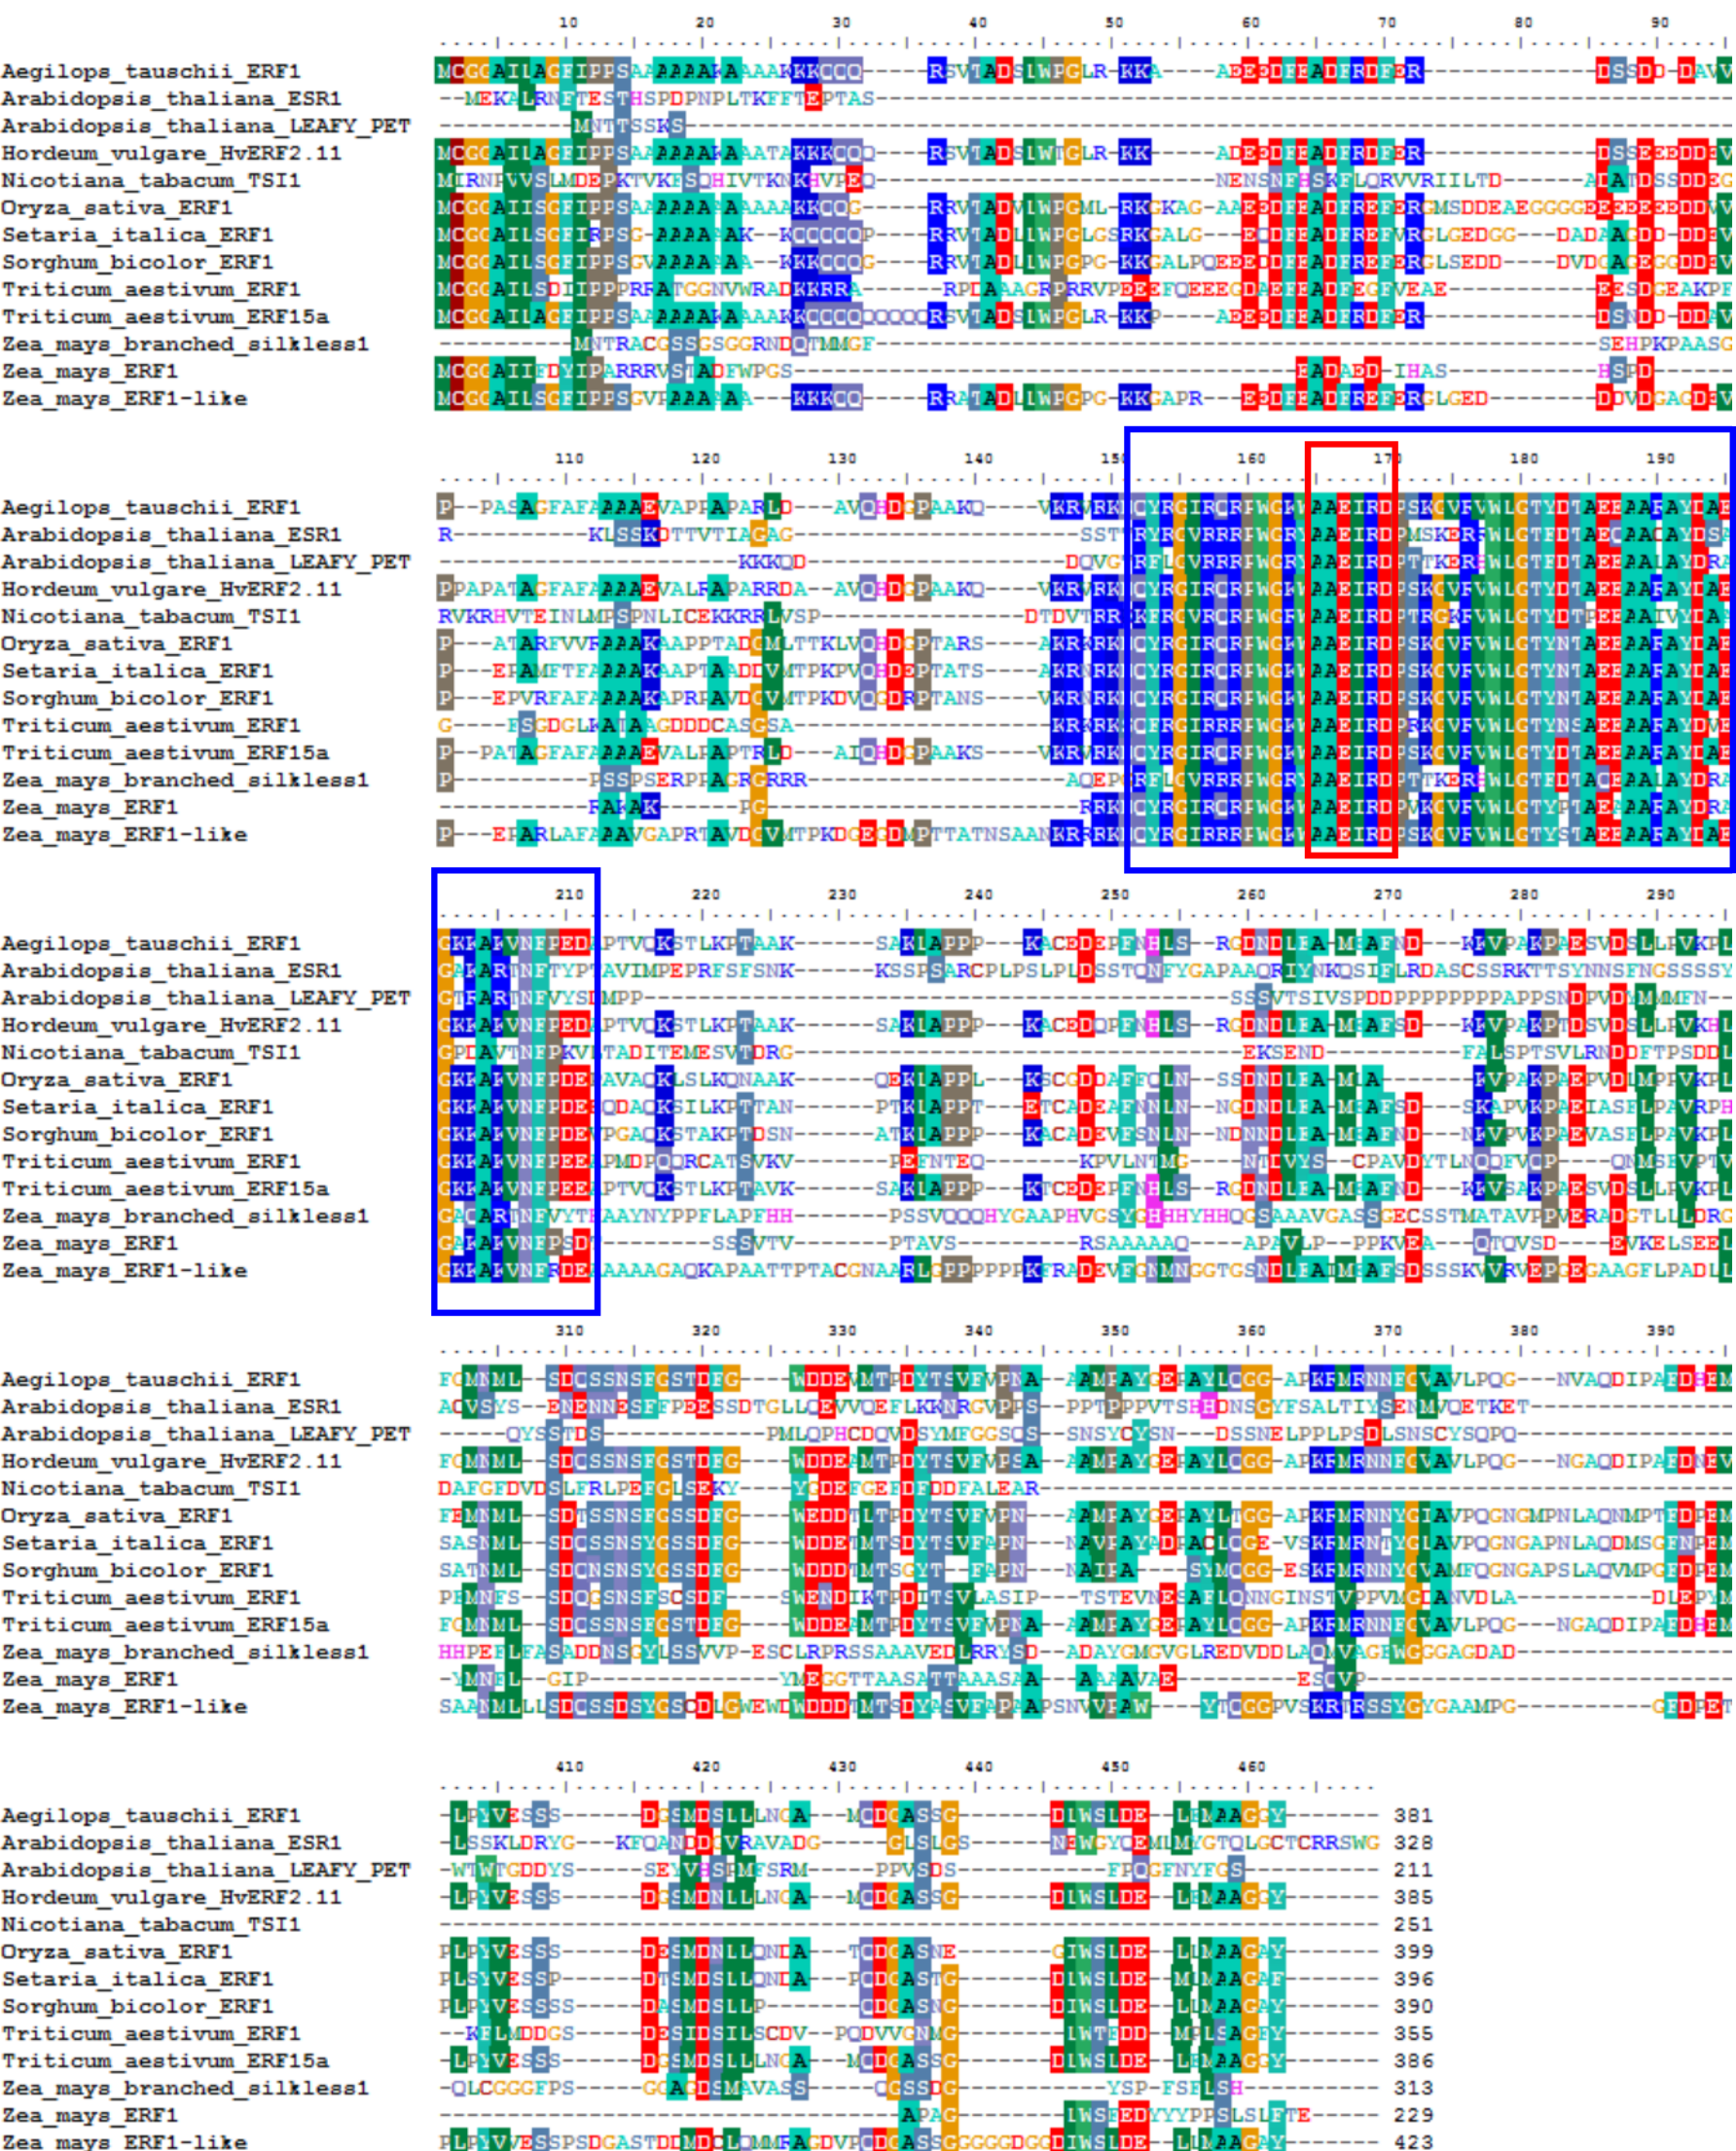

 AAEIRD-motif

 AP2 domain
